1 **Isolation and Purification of Active Antimicrobial Peptides from**  
2 ***Hermetia illucens* L., and Its Effects on CNE2 Cells**

3 ----- anticancer effect of antimicrobial peptides

4

5 **Zhong Tian<sup>#</sup>, Qun Feng<sup>#</sup>, Hongxia Sun, Ye Liao, Lianfeng Du, Rui Yang, Xiaofei Li,**

6 **Yufeng Yang, Qiang Xia<sup>\*</sup>**

7

8 Department of Immunology and Pathogenic Biology, Zhuhai Campus of Zunyi Medical

9 University, Zhuhai 519041, P. R. China

10

11 <sup>\*</sup>Corresponding author.

12 [Tel: +86 13825633506](tel:+8613825633506); Fax: +86 7657623326

13 E-mail address: [xiaqiang1973@126.com](mailto:xiaqiang1973@126.com)

14 <sup>#</sup>These two authors contributed equally to this work.

15 **Summary Statement**

- 16 1. An active antimicrobial peptide HI-3 was isolated and purified.
- 17 2. Inhibitory proliferation of CNE2 cells, but no effect on normal cells.
- 18 3. A potential antitumoral drug.

19 **Abstract:** Active antimicrobial peptide HI-3 was isolated and purified from the 5<sup>th</sup> instar  
20 larvae of *Hermetia illucens* L., and its effects on proliferation, apoptosis and migration of  
21 nasopharyngeal carcinoma (CNE2) cells were investigated. The expressions of telomerase  
22 reverse transcriptase (hTERT) in CNE2 cells were also studied *in vitro* to elucidate the  
23 mechanism involved in the action of HI-3 on CNE2 cells. Results showed that three fractions  
24 (HI-1, HI-2, HI-3) were isolated from the hemolymph of *H. illucens* larvae. After purified by  
25 RP-HPLC, only HI-3 showed the inhibitory activities to four strains of bacteria. It was also  
26 showed that HI-3 could effectively inhibit the proliferation of CNE2 cells in a dose- and time-  
27 dependent manner. Apoptosis of CNE2 cells was observed in the treatment with 160 µg/ml  
28 HI-3, and the early apoptosis rate up to  $27.59 \pm 1.14\%$ . However, no significantly inhibitory  
29 effects and apoptosis were found on human umbilical vein endothelial cells (HUV-C).  
30 Moreover, HI-3 could significantly reduce the migration ability of CNE2 cells when  
31 compared with that of the control. On the other hand, the levels of mRNA and protein of  
32 hTERT in the HI-3 treatment were all significantly lower than that of the control. Results  
33 indicated that HI-3 could inhibit the proliferation of CNE2 cells and induce the apoptosis of  
34 CNE2 cells by down-regulating the telomerase activity in CNE2 cells, while no obvious effect  
35 was occurred on HUV-C. It inferred that HI-3 is a potential anti-tumor drug with low toxicity  
36 to normal cells.

37 **Keywords:** *Hermetia illucens*; proliferation; cell migration; apoptosis; telomerase

## 38 **1. Introduction**

39 More and more attentions were paid on the nasopharyngeal carcinoma (NPC) for its  
40 high incidence rates in Asia. Data from IARC showed that the incidence rates of NPC were  
41 up to 71.02% for men, which was nearly 2.45 times higher than that of women in Asian  
42 countries, especially in the country of Malaysia, Singapore, Indonesia and China  
43 (Mahdavifar et al., 2016). Currently, the traditional surgery combined with  
44 chemoradiotherapy was widely applied during its therapy. However, the radiotherapy and  
45 chemotherapy would inevitably damage the normal cells and the patient's immune systems  
46 (Ng and Lee, 2017), which more or less lead to the toxicity and severe effects in some  
47 tissues and organs (Thangavel et al., 2016). And the strong invasion ability of NPC cells and  
48 its inclination to distal metastasis made its treatments become more difficult (Jiang et al.,  
49 2014; Yang et al., 2013). Therefore, looking for a new, safe and effective anticancer agent  
50 for treatment of NPC has become a hot research direction worldwide.

51 Antimicrobial peptides (AMPs), the small molecule peptides that were firstly discovered  
52 by Boman research team, were found to have anti-bacterial, anti-viral, and anti-fungal  
53 properties. It was reported that AMPs could act rapidly to combat the invasion of potential  
54 pathogens, and thus serve to limit the extent of infection prior to activation of the adaptive  
55 immune response (Wanmakok et al., 2018). Furthermore, some of these peptides were  
56 found to display a wide range of biological activities and have been shown to exert  
57 antitumoral activity (Cerón et al., 2010). Nowadays, AMPs are considered as a potential  
58 alternative for the treatment of emerging drug-resistant infections and cancer (Riedl et al.,  
59 2011). The detailed mechanisms involved in antitumoral activities of AMPs were also

60 gradually established. Studies showed that AMPs might disrupt tumor cell membranes  
61 integrity and act on mitochondria or DNA to exert its antitumoral activity (Lemeshko, 2013).  
62 It was also reported that AMPs perform its anticancer effects by regulating the organisms'  
63 immune system. Studies have indicated that the organisms' immune defenses were enhanced  
64 by inducing dendritic cell aggregation and increasing the expression of lymphocytes after  
65 AMPs treatment, and the development of cancer was also inhibited (Huang et al., 2015).

66 In recent years, it was revealed that the telomerase might also be involved in the  
67 antitumoral mechanisms of AMPs. In normal cells, the expressions of telomerase were  
68 extremely low, or even none. However, their expression levels were significantly increased  
69 in malignant proliferative cells to protect their chromosomes and to promote the cells to  
70 proliferate indefinitely (Li et al., 2014; Ale-Agha et al., 2014). Generally, the main structure  
71 of telomerase includes telomerase reverse transcriptase (TERT) and telomerase-associated  
72 proteins (Blackburn et al., 2006). TERT, as the catalytic subunit of telomerase, plays a key  
73 role in telomerase synthesis and telomerase activity maintenance, especially in promoting  
74 the cells carcinogenesis (Borah et al., 2015). It was reported that higher levels of TERT  
75 mRNA were expressed in lung cancer-derived human cell line H1299, while lower levels in  
76 those of normal cells (Bodnar and Wright, 1998). Study also found that plasma TERT  
77 mRNA levels were significantly higher in the patients with liver cancer and prostate cancer  
78 than those in the normal group (El-Mazny et al., 2014), and the levels of TERT mRNA were  
79 closely related to various clinical and pathological conditions (Kang et al., 2013). Similar  
80 results were also reported by FU et al. (2015), which found that plasma hTERT mRNA  
81 levels in peripheral blood were significantly higher in patients with NPC than those in the

82 normal groups through the quantitative detection of telomerase hTERT mRNA. In addition,  
83 the levels of telomerase hTERT mRNA were also been shown to be up-regulated, followed  
84 by the G1/S blockade and chemotherapeutic drug resistance under hypoxia in NPC. Until  
85 the hypoxia reversed, the telomerase activities were decreased, and chemo-resistance was  
86 improved (Shi et al., 2015). From these studies, it was inferred that the telomerase activity  
87 was closely related to the occurrence and development of NPC.

88 The black soldier fly, *Hermetia illucens* L. is considered as a beneficial resource insect  
89 in Diptera family. Its larvae are reported as feeding on immense variety of organic material,  
90 and have been used in small-scale waste management purpose to reduce manure  
91 accumulations in confined animal feeding operations and the accumulations of other wastes.  
92 The habit of *H. illucens* larvae, which is extremely rich in various microorganisms including  
93 many pathogenic ones, implies that the immune system of this insect functions works very  
94 efficiently (Park et al., 2014). Since its first report in 2013 by our research group (Xia et al.,  
95 2013), AMPs of this insect, which are essential components of innate immune system of *H.*  
96 *illucens* larvae, have been paid more and more attentions and been considered to have  
97 potential applications in the medicine fields (Choi and Jiang, 2014; Park et al., 2015; Vogel  
98 et al., 2018). AMPs of *H. illucens* have showed good antibacterial activity for gram-positive  
99 bacteria, gram-negative bacteria and fungi (Elhag et al., 2017). However, no research was  
100 focused on their anti-cancer activity and related mechanisms. Therefore, in the present study,  
101 the AMPs were isolated and purified from the hemolymph of *H. illucens* larvae, and the  
102 active components HI-3 were screened out to investigate its effects on the proliferation,  
103 apoptosis and migration of nasopharyngeal carcinoma (CNE2) cells. Furthermore, the

104 expressions of telomerase in CNE2 cells were also studied to explore the possible  
105 mechanism of HI-3 action. We hope the results would provide theoretical basis for the  
106 research and development of the *H. illucens* AMPs as a potential antitumoral agent.

107

## 108 **2 Materials and methods**

### 109 **2.1 Insects, bacteria and cells**

110 *H. illucens* L. was provided by Zhuhai Modern Agriculture Development Center. The  
111 larvae were feed with artificial feed (wheat bran: corn flour: chick feed=5: 3: 2) and kept in a  
112 greenhouse of 27 °C, RH 80%, photoperiod 14 L: 10 D.

113 The four strains of bacteria *Staphylococcus aureus*, *Escherichia coli*, *Bacillus subtilis*, and  
114 *Enterobacter aerogenes* were obtained from Immunology and Pathogenic Biology Laboratory  
115 of Zunyi Medical University.

116 Standard strains of human CNE2 cells and human umbilical vein endothelial cells  
117 (HUV-C) were purchased from Shanghai ATCC Cell Bank of Chinese Academy of Sciences.

118 Tricine-SDS PAGE gel kit was purchased from Sigma; CCK-8 kit, Hoechst33342 staining  
119 kit, and Annexin V-FITC/PI double staining kit were purchased from Japan Tongren Institute  
120 of Chemistry; RT-PCR telomerase detection kit was purchased from Nanjing Kaiji Biological  
121 Co., Ltd.; hTERT antibody was purchased from ABclonal Company.

122 Vertical electrophoresis (Mini-PROTEAN Tetra), Horizontal electrophoresis(YCP-31DN),  
123 Automatic microplate reader(Elx-800), RT-PCR (621BR07707) were from Bio-Rad;  
124 RP-HPLC (LC-C8002) was from Shimadzu Corporation; Inverted fluorescence microscopy  
125 (IX71) was from OLYMPUS Corporation; Flow cytometry (FACS Calibur) was from  
126 Beckman Coulter Corporation.

127

## 128 **2.2 Induction and Extraction AMPs from the larvae of *H. illucens***

129 According to the method mentioned in Xia et al (2013), the 20,000 fifth instar larvae of  
130 *H. illucens* were selected for induction. The larvae in the induction group were received  
131 abdomen acupuncture treated with *Staphylococcus aureus* (A260=2.4), while those in the  
132 control group were acupunctured with culture medium. After 24 h treatment, the hemolymph  
133 of larvae in the induction and control group was collected into Eppendorf centrifuge tubes and  
134 centrifuged at 12,000 rpm for 10 min at 4°C. Then, the supernatant was transferred into a 10  
135 kD ultrafiltration centrifuge tube and centrifuged at 12,000 rpm for 15 min at 4 °C. The  
136 ultrafiltrate was again transferred to a 3 kD ultrafiltration centrifuge tube and centrifuged  
137 under the same conditions. The retention section, which is AMP crude extract, was  
138 freeze-dried in vacuo and stored in a refrigerator at -80 °C for use.

139

## 140 **2.3 Purification of AMPs from crude extract**

141 The crude extract of AMPs was separated by RP-HPLC system. The column was the  
142 type of LC-C8002, 4.6 mm × 250 mm, 10 μm, and column temperature at 40 °C. The mobile  
143 phase was 0.1% (v/v) TFA (phase A) and acetonitrile with 0.1% TFA (phase B) at a flow rate  
144 of 0.5 ml/min. UV detector wavelength was set at 214 nm. According to the retention time of  
145 the peak, the components corresponding to each peak were collected.

146 Purity of HI-3 was also detected by RP-HPLC. And the chromatographic conditions  
147 were same as mentioned above 0.5 ml/min, detection wavelength 214 nm, temperature 40 °C.

148

## 149 **2.4 Antibacterial activity assays**

150 Four strains of bacteria, *Staphylococcus aureus*, *Escherichia coli*, *Bacillus subtilis* and  
151 *Enterobacter aerogenes*, were formulated into bacterial liquid at the concentration of 3.2



152  $\times 10^{12}$ /ml, separately. Then, 50  $\mu$ l of each bacterial liquid was evenly coated in the LB solid  
153 medium. When the bacterial liquid was dry, the sterile filter paper with a diameter of 6mm,  
154 which were treated with 25  $\mu$ l of Gentamicin sulfate (as positive control), saline (as negative  
155 control) and purified AMPs (named as HI-1, HI-2, HI-3) separately, were placed on the  
156 medium. Four replicates were set. After incubated at 37 °C for 24 h, the size of the inhibition  
157 zone was observed and measured (Xia et al., 2013).

158 The value of MIC (minimum inhibitory concentration) about the component HI-3 with  
159 strong antibacterial activity was detected by MH broth dilution method. Gentamicin sulfate  
160 was used as positive control. Absorbance value was read at 595 nm to calculate the inhibition  
161 rate Y.

$$162 \quad Y = (A_0 - A_1) / (A_0 - A_2) \times 100\%$$

163 Among them , A0 is the absorbance value in the negative control, A1 is the value in the HI-3  
164 treatment, and A2 is the value in positive control.

165 MIC was recorded as the minimum inhibitory concentration at which the inhibition rate  
166 was not less than 80%.

167

## 168 **2.5 Estimation of cytotoxicity in CNE2 cells and HUV-C**

169 To test the cell viability after treatment with HI-1, HI-2 and HI-3, CCK-8 kit was run.  
170 Cells were plated at a density of  $1 \times 10^5$  cells/100  $\mu$ l/well in 96-well plates for 24 h. Four  
171 replicates were set for each treatment. Then, the medium was discarded and replaced by  
172 different concentrations (5  $\mu$ l/ml, 10  $\mu$ g/ml, 20  $\mu$ g/ml and 40  $\mu$ g/ml) of HI-1, HI-2, HI-3,  
173 respectively, or medium alone for 24 h and 48 h. This was followed by the addition of 20  $\mu$ l  
174 of CCK-8 solution for 2 h at 37 °C in 5% CO<sub>2</sub> incubator. The optical density was measured  
175 spectrophotometrically at 490 nm on a microtiter plate reader. Results were expressed as a

176 percentage of the inhibition rate for viable cells, and values of the medium only group were  
177 regarded as negative control.

178 Inhibition rate (%) =  $(A_{\text{negative control}} - A_{\text{treatment}}) / A_{\text{negative control}}$

179

## 180 **2.6 Effects of HI-3 on apoptosis and migration of CNE2 cells**

### 181 **2.6.1 Apoptosis of CNE2 cells**

182 The CNE2 cells and HUV-C were maintained in RPMI-1640 and DMEM medium  
183 supplemented with 10% FBS, respectively. Cells were maintained in incubator under a fully  
184 humidified atmosphere of 95% room air and 5% CO<sub>2</sub> at 37 °C. Briefly, the cell density was  
185 adjusted to 1×10<sup>5</sup> cells/ml, and 100 µl of cell suspensions were placed onto 96-well plates.  
186 Four replicates were set for each treatment. The medium was removed after 24 h, and HI-3  
187 was added to cell cultures at a final concentration of 40 µg/ml, 80 µg/ml and 160 µg/ml. After  
188 incubation for 48 h at 37 °C in a humidified atmosphere with 5% CO<sub>2</sub>, 5 µl of Hoechst33342,  
189 a DNA specific fluorescent dye, which stains the condensed chromatin of apoptotic cells more  
190 brightly than the chromatin of normal cells, was added to each well and incubated for 15  
191 minutes at room temperature. Morphological changes in nuclear chromations of cells in  
192 control and each treatment were observed with fluorescence microscope, and the influence of  
193 HI-3 on the apoptosis rate of CNE2 cells and HUV-C was detected by flow cytometry (FCM)  
194 (Yan et al., 2015).

195

### 196 **2.6.2 Migration of CNE2 Cells**

197 The HUV-C and CNE2 cells suspension was prepared as the method mentioned in 2.7.1.  
198 2 ml of cell suspension was placed into a 6-well plate and incubated at 37 °C in the incubator  
199 with 5% CO<sub>2</sub>. After the cells were fully covered the plate, the cells in each well was

200 perpendicularly streaked with a 200  $\mu$ l of pipette tip, followed by washing with PBS. Then, 2  
201 ml of HI-3 diluted with 2% FBS and 0.2% colchicine was added to cell cultures at a final  
202 concentration of 160  $\mu$ g/ml, while the negative control received with the same volume of  
203 solution without HI-3. After 0 h, 12 h, 24 h and 48 h incubation, the scratches were observed  
204 and photographed to calculate the mobility.

205 
$$\text{Mobility (\%)} = (\text{W0-WK})/\text{W0} \times 100\%$$

206 Among them, W0 is the width of scratches at 0 h, WK is the width of scratches at 12 h, 24 h,  
207 48 h, respectively.

208

## 209 **2.7 RT-PCR analysis of telomerase hTERT gene expression**

210 RT-PCR was used to analyze gene expression of telomerase hTERT in CNE2 cells  
211 treated with 160  $\mu$ g/ml of HI-3 for 48 h. And the cells without treatment were set as control.  
212 The primers used for hTERT were upstream 5'-GCCGATTGTGAACATGGACTACG-3' and  
213 downstream 5'-GCTCGTAGTTGAGCACGCTGAA-3'. Primer pair for GAPDH (upstream  
214 5'-CATCTTCTTTGCGTCGCCA-3'; downstream 5'-TTAAAAGCAGCCCTGGTGACC-3')  
215 was used as the reference gene. Reaction system involved each 1  $\mu$ l of primers of upstream  
216 and downstream, 2  $\mu$ l of template RNA, 2.75  $\mu$ l of RT-PCR MIX (including reverse  
217 transcriptase, Taq DNA polymerase and RNase inhibitor), 25  $\mu$ l of 2 $\times$  reaction buffer, and  
218 RNase free water which was added to a total volume of 50  $\mu$ l. The samples were denatured at  
219 94  $^{\circ}$ C for 5 min, followed by a 40 cycles reaction: 94  $^{\circ}$ C for 30 s, 60  $^{\circ}$ C for 30 s, 72  $^{\circ}$ C for 1  
220 min; and by the extension at 72  $^{\circ}$ C for 10 min. The 10  $\mu$ l of PCR products were separated by  
221 1% agarose gel electrophoresis, and the expressions of hTERT gene were analyzed by  $2^{-\Delta\Delta C_t}$   
222 method using GAPDH as internal reference gene.

223

## 224 **2.8 Western blotting analysis of the telomerase hTERT protein expression**

225 Western blotting for detecting telomerase hTERT was performed after CNE2 cells were  
226 treated with HI-3 at the final concentration of 160  $\mu\text{g}/\text{ml}$  for 48 h. Briefly, the cells were  
227 harvested and the cellular protein were extracted by homogenization in 100  $\mu\text{l}$  lysate on ice  
228 for 30 min. The lysates were then centrifuged at 12,000 rpm for 30 min at 4  $^{\circ}\text{C}$ . The proteins  
229 were quantified using the Bradford method, and 30  $\mu\text{g}$  proteins were separated using  
230 SDS-PAGE gel and transferred onto PVDF membranes (Millipore, USA). Non-specific  
231 binding was prevented using a solution of 5% non-fat dry milk at room temperature for 1 h,  
232 and then washed with TBST for 3 times. Blots were incubated with the primary antibody  
233 diluted 1: 1000 primary antibody (for hTERT and GAPDH) diluted with 2% BSA in TBS  
234 containing 0.1% Tween-20 (TBST) overnight at 4  $^{\circ}\text{C}$ . After washing with TBST for 3 times,  
235 the blots were incubated with mouse-derived secondary antibody diluted 1: 3000 with 1%  
236 BSA in TBST for 1 h at room temperature. Following additional washing, gray-scale of  
237 specific bands was detected with ECL development.

238

## 239 **2.9 Statistical analysis**

240 Results were expressed as means  $\pm$  SEM. To analyze the differences between control and  
241 treatments, single-factor analysis of variance in SPSS 20.0 software was used. Statistical  
242 differences were considered significant at a value of  $P < 0.05$ .

243

## 244 **3 Results**

### 245 **3.1 Isolation and purification of antimicrobial peptides**

246 The crude extract from the hemolymph of *H. illucens* larvae is clear and transparent, and  
247 exhibits white powder after freeze-dried in vacuo. After PR-HPLC analysis, three compounds,  
248 HI-1, HI-2 and HI-3, were well separated from the crude extract in the induced group (Figure  
249 1-1)). And the purity of HI-3 was up to 96.1% after purification (Figure 1-2)).

250

### 251 **3.2 Antibacterial activity of three separated components**

252 As shown in Table 1, only HI-3 showed significant antibacterial activity on the all four  
253 strains of bacteria when compared with that in the negative control ( $P < 0.05$ ). Furthermore,  
254 the antibacterial activity of HI-3 to *Bacillus subtilis* ( $10.84 \pm 1.00$  mm) *Staphylococcus*  
255 *aureus* and *Escherichia coli*, which inhibition zone diameter was  $10.84 \pm 1.00$  mm, was  
256 significantly lower than that to *Staphylococcus aureus* ( $11.79 \pm 1.178$  mm), *Escherichia coli*  
257 ( $11.83 \pm 0.82$  mm) and *Enterobacter aerogenes* ( $11.41 \pm 0.78$  mm) ( $P < 0.05$ ).

258

### 259 **3.3 MIC of HI-3 to the four strains of bacteria**

260 From Figure 2, it was indicated that inhibitory rates of HI-3 against the four types of  
261 bacteria were all positively correlated with the concentration of active component HI-3. After  
262 analysis, the MICs of HI-3 to *Staphylococcus aureus*, *Bacillus subtilis*, *Escherichia coli* and  
263 *Enterobacter aerogenes* were 80  $\mu\text{g/ml}$ , 160  $\mu\text{g/ml}$ , 80  $\mu\text{g/ml}$  and 80  $\mu\text{g/ml}$ , respectively.  
264 From these results, it can be seen that the HI-3 was less sensitive to *Bacillus subtilis* than  
265 those of the other three bacteria, which was similar to the results of antibacterial activity of  
266 HI-3.

267

### 268 **3.4 HI-3 induces cytotoxicity on CNE2 cells**

269 According to the growth curve of CNE2 cells and HUV-C detected by CCK-8 kit, CNE2  
270 cells entered logarithmic growth phase on the 2nd day, while HUV-C on the 3rd day.  
271 Therefore, CNE2 cells after 2 days of culture and HUV-C after 3 days of culture were chosen  
272 for follow-up experiments, respectively, to verify the effects of HI-1, HI-2 and HI-3 on the  
273 proliferation of the two cells.

274 The dose- and time-dependent effects of HI-1, HI-2 and HI-3 against CNE2 cells were  
275 shown in Table 2. No significant effects on the proliferation of CNE2 cells were found after  
276 treatment with HI-1 and HI-2 for 12 h, 24 h and 48 h, respectively. When the concentration of  
277 HI-3 was among 40-160  $\mu\text{g/ml}$ , HI-3 exhibited significantly inhibitory activity on the  
278 proliferation of CNE2 cells when compared to that in the corresponding HI-1 and HI-2 groups  
279 ( $P < 0.05$ ). Furthermore, the inhibitory rate on the proliferation of CNE2 cells also increased  
280 with the treatment period of HI-3 at the concentration of 40-160  $\mu\text{g/ml}$ , and the maximal  
281 inhibitory rate was recorded in the 160  $\mu\text{g/ml}$  HI-3 after 48 h treatment (Table 2; Figure 3).  
282 By contrast, HI-3 treatment had no significant effect on the proliferation of HUV-C ( $P > 0.05$ )  
283 (Data not shown).

284

### 285 **3.5 HI-3 induced apoptosis of CNE2 cells**

286 To investigate the mode of action underlying the cytotoxic activity of HI-3 at the  
287 concentrations of 40-160  $\mu\text{g/ml}$ , the CNE2 cells and HUV-C were incubated with HI-3 for 48  
288 h for fluorescence microscope and FCM.

289 Representative micrographs by fluorescence microscope revealed that the CNE2 cells in the  
290 control was membrane-intact and light blue, and the emitted fluorescence was weak (Figure  
291 4-1)-A). After 48 h treatment with 40  $\mu\text{g/ml}$  HI-3, increased fluorescence intensity was  
292 observed in the CNE2 cells, indicating that HI-3 disrupted the integrity of the plasma  
293 membrane, and the symptoms of early apoptosis occurred. However, the fluorescence  
294 intensity is still uniform, which meant that the chromosomal DNA was not destroyed. With  
295 the increasing HI-3 concentration, the fluorescence intensity in CNE2 cells was further  
296 improved, indicating that the permeability of the plasma membrane was gradually increased  
297 (Figure 4-1)-B, 4-1)-C). When the concentration of HI-3 was up to 160  $\mu\text{g/ml}$ , the CNE2 cells  
298 exhibited the strongest fluorescence intensity, and the number of brightly stained cells with  
299 DNA damage was also increased. Furthermore, the typical characteristics of cell apoptosis,

300 such as highly aggregated and fragmented chromatin, and dispersed apoptotic bodies, were  
301 appeared. These results exhibited that high concentration of HI-3 induced drastic changes in  
302 the cellular morphology (Figure 4-1)-D, arrow).

303 By contrast, there were no obvious changes in the morphology of HUV-C after treated with  
304 different concentrations of HI-3 for 48 h (Figure 4-2)).

305 Results from FCM detection showed that exposure to HI-3 at the concentrations of 40-160  
306  $\mu\text{g/ml}$  for 48h caused a dose-dependent increase in the apoptosis rate of CNE2 cells compared  
307 to that of the control cells. And the apoptosis rate in all the treatments was all significantly  
308 higher than that in the control ( $P < 0.05$ ), as well as higher than that in the corresponding  
309 HUV-C. The results demonstrated that HI-3 induced apoptosis of CNE2 cells after 48 h  
310 exposure (Figure 5-1); 5-3)). Same to the fluorescence microscope results, HI-3 exposure did  
311 not resulted in significantly improved apoptosis rate in the HUV-C (Figure 5-2); 5-3)).

312

### 313 **3.6 HI-3 inhibited the Migration of CNE2 cells**

314 After making a wound with a pipette tip, it was observed that HI-3 effectively inhibited the  
315 migration of CNE2 cells in time-dependent manners when compared to the untreated control  
316 cells. The migration rate of CNE2 cells exposed to 160  $\mu\text{g/ml}$  HI-3, which was  $24.43 \pm 0.47\%$ ,  
317  $61.5 \pm 0.04\%$  and  $80 \pm 0.33\%$ , respectively, were all significantly lower than that of cells in  
318 the control ( $50.32 \pm 0.24\%$ ,  $91.17 \pm 0.15\%$  and  $100\%$ ) ( $P < 0.05$ ) (Figure 6).

319

### 320 **3.7 Effect of HI-3 on telomerase hTERT gene expression in CNE2 cells**

321 As showed in Figure 14, the brightness of 28S band is about 2 times of that of 18S band,  
322 and no tailing phenomenon occurred, indicating that the RNA quality is qualified without  
323 degradation and DNA contamination. After HI-3 treatment for 48 h, the expression of hTERT

324 mRNA was significantly down-regulated in the CNE2 cells compared with that in the control  
325 ( $P < 0.05$ ) (Figure 7-1); Table 3). Simultaneously, telomerase hTERT protein expression also  
326 significantly decreased. The expression of hTERT protein in the control cells ( $1.19 \pm 0.21$ )  
327 was significantly higher than that in the HI-3 treated cells ( $0.63 \pm 0.12$ ) by gray value analysis  
328 ( $P < 0.05$ ) (Figure 7-2, 7-3)).

329

#### 330 **4 Discussion**

331 In this study, we demonstrated that a small molecule peptide HI-3, purified from the  
332 hemolymph of *H. illucens* larvae after acupuncture induction with *Staphylococcus aureus*,  
333 showed inhibitory effects on both gram-positive and gram-negative bacteria, as well as on the  
334 proliferation of CNE2 cells to some extent. It was also found that HI-3 could induce the  
335 apoptosis and inhibit the migration of CNE2 cells. Further studies confirmed that HI-3 could  
336 significantly inhibit the expression of hTERT. An interesting observation in this study is that  
337 HI-3 had more deleterious effects towards CNE2 cells than toward normal cells. Its antitumor  
338 activity towards CNE2 cells was unlike that of chemotherapeutic agents, for they cannot  
339 discriminate between normal and cancer cells. These results support our assumption that HI-3  
340 may act on a potential antitumor drug without toxic development.

341 After acupuncture induction with *Staphylococcus aureus*, three components were  
342 separated from the hemolymph of *H. illucens* larvae. However, only HI-3 showed different  
343 degrees of antibacterial activities against all selected bacteria, which was consistent with the  
344 broad-spectrum antibacterial effects of AMPs reported in the previous studies. Generally,  
345 AMPs exert their antibacterial activity through the destruction of the plasma membrane (Lee  
346 et al., 2015a; Nguyen et al., 2011). Due to their amphipathic nature, most of AMPs are  
347 positively charged and can interact with the negatively charged phospholipid bilayer on the  
348 bacterial surface by electrostatic action or with other anions on the membrane to form ion  
349 channels on the plasma membrane (Huang et al., 2010). It was found that the AMP attacins



350 from the silkworm could inhibit the growth of gram-negative bacteria by inhibiting the  
351 synthesis of membrane proteins; and moricin, another antibacterial peptide, could exert its  
352 antimicrobial activity by increasing membrane permeability (Ravi et al., 2011). Though the  
353 plasma membranes of CNE2 cells were disrupted by HI-3 treatment in this study, whether the  
354 mechanism of HI-3 against bacteria was through this action still need further study.

355 AMPs isolated from insects, including melittin, cecropin related peptides and magainins  
356 have been shown to exhibit antitumoral activity for cells derived from mammalian tumors  
357 (Lee et al., 2015b; Su et al., 2015). In the present study, HI-3 at the concentration of 40-160  
358  $\mu\text{g/ml}$  also exhibited the proliferation inhibition of CNE2 cells in a dose- and time- dependent  
359 manner. However, the negative control cells HUV-C were not affected by HI-3 treatment.  
360 These results were similar to the study of Wang et al. (2012), which found that the AMP  
361 temporin-ICEa have different degrees of inhibition against the growth of various types of  
362 tumor cells, while normal human erythrocytes and HUVMSCs cells were not affected.  
363 Different studies have attempted to explain the mechanisms that the tumor cells are more  
364 sensitive to AMPs treatments (Wang et al., 2016). For the surface of tumor cells membrane  
365 holds more negatively charged phosphatidylserine, abnormal expressed polysaccharide  
366 proteins and increased sialylation when compared with the normal cells, some investigations  
367 have determined that one of its antitumoral mechanisms was through destructing the cell  
368 membrane, which was similar to that of the antibacterial activity. For example, Slaninová et al.  
369 (2012) demonstrated that AMP from wild-type bee venom exerted the cytotoxic effects on  
370 tumor cells through enhancing the permeability of tumor cell membranes. Chang et al. (2011)  
371 reported that the AMP tilapia hepcidin(TH)1-5 could bind to the membranes of HepG2 and  
372 HeLa tumor cells, breaking the cell membrane through a process similar to that of cytolysis,  
373 and eventually lead to cell necrosis. In addition, the toxicity of AMP D-peptide from beetles  
374 against tumor cells mainly depended on the negative charge carried by phosphatidylserine in  
375 the tumor cell membrane (Iwasaki et al., 2009). In present study, fluorescence intensity in  
376 CNE2 cells increased with the increasing concentration of HI-3 in a dose-dependent manner,

377 indicating that the target site of HI-3 might also be the membrane. Furthermore, the increasing  
378 apoptosis rates in CNE2 cells after HI-3 treatment might also be related with the gradually  
379 improved membrane permeability, though more researches should be investigated.

380 HI-3 was able to inhibit the migration of CNE2 cells to a certain extent according to our  
381 cell scratch assay. Generally, tumor cells have a strong ability of invasion and metastasis.  
382 Distal metastasis and subsequent increased malignant proliferative capacity are among the  
383 major problems during the oncotherapy. Relevant study revealed that an amphibian AMP  
384 Temporin-1CEa could inhibit the invasion and metastasis of melanoma A375 cells whereby  
385 regulating the release of metalloproteinase-2 and vascular growth factor (Zhang, 2015).  
386 However, few studies have focused on the specific mechanisms concerning the migration of  
387 cancer cells treated with AMP. The deep research remains to be explored.

388 Higher activity telomerase could be detected in malignant proliferative cancer cells.  
389 Therefore, telomerase is considered as an important and effective target for anti-tumor  
390 therapy (Chen et al., 2016). For example, the growth inhibition of human colon cancer  
391 HCT166 cells by AZT (3'-Azido-3'-deoxythymidine) was mediated by inhibiting telomerase  
392 activity and hTERT gene expression (Hu and Xu, 2017). Our study also found that hTERT  
393 gene expression and hTERT protein expression were significantly decreased after HI-3  
394 treatment, indicating that the down-regulating of telomerase activity was involved in the  
395 inhibition of NPC. On the other hand, it was reported that in addition to its function of  
396 maintaining intracellular DNA and chromosomes stability, telomerase is also involved in the  
397 regulation of mitochondrial function and gene expression during tumorigenesis (Chiodi and  
398 Mondell, 2012). For hTERT is the key protein of telomerase synthesis, it might also be  
399 involved in the action of telomerase in the occurrence and development of cancer. However,  
400 the regulation effect of telomerase and hTERT in the HI-3 induced inhibition of proliferation  
401 of CNE2 cells still need further investigation. And whether the mitochondrial pathway was  
402 induced in the HI-3 action also remains to be explored.

403        From these results, we concluded that HI-3 has the potential for development as a new  
404        type of antitumoral agent, for HI-3 is less toxic to normal cells. It was confirmed that HI-3  
405        might exert its antitumoral effect through down-regulating the expression of hTERT.  
406        However, the specific mechanism involved in the HI-3 still need deep investigations.

407 **Acknowledgements**

408       We thank Prof. Guren Zhang for comments that greatly improved the manuscript, and we

409 thank the “anonymous” reviewers for their constructive suggestions.

410 **Competing interests**

411 The authors have declared that no competing interests exist.

412 **Author contributions**

413           Zhong Tian and Qun Feng performed the experiments, Hongxia Sun and Ye Liao drafted  
414 and revised the manuscript, Lianfeng Du and Rui Yang performed the data analyses, Xiaofei  
415 Li and Yufeng Yang helped perform the analysis with constructive discussions, and Qiang  
416 Xia designed the experiments.

417 **Funding**

418 This work was supported by the grants from The Major Research Project of the Innovation  
419 Group of the Education Department of Guizhou Province (KY characters [2016]037 in  
420 Guizhou Province); The National Nature Sciences Fund (31260528); and Guizhou Science  
421 and Technology Fund (KY characters [2009]2295 in Guizhou Province).

422 **References**

- 423 Ale-Agha, N., Dyballa-Rukes, N., Jakob, S., Altschmied, J., and J. Haendeler. (2014).  
424 Cellular functions of the dual-targeted catalytic subunit of telomerase, telomerase reverse  
425 transcriptase --potential role in senescence and aging. *Exp Gerontol.* 56, 189-193.
- 426 Blackburn, E. H., Greider, C. W., and J. W. Szostak. (2006). Telomeres and telomerase: the  
427 path from maize, Tetrahymena and yeast to human cancer and aging. *Nat Med.* 12,  
428 1133-1138.
- 429 Bodnar, A. G., and Wright, W. E. (1998). Extension of life-span by introduction of telomerase  
430 into normal human cells. *Science.* 279, 349-352.
- 431 Borah, S., Xi, L., Zaug, A. J., Powell, N. M., Dancik, G. M., Cohen, S. B., Costello, J. C.,  
432 Theodorescu, D., and Cech, T. R. (2015). Cancer. TERT promoter mutations and telomerase  
433 reactivation in urothelial cancer. *Science.* 347, 1006-1010.
- 434 Cerón, J. M., Contreras, M. J. E., de Cienfuegos, G. A., Puertollano, M. A., and de Pablo, M.  
435 A. (2010). The antimicrobial peptide cecropin A induces caspase-independent cell death in  
436 human promyelocytic leukemia cells. *Peptides.* 31, 1494-1503
- 437 Chang, W. T., Pan, C. Y., Rajanbabu, V., Cheng, C. W., and Chen, J. Y. (2011). Tilapia  
438 (*Oreochromis mossambicus*) antimicrobial peptide, hepcidin 1-5, shows antitumor activity in  
439 cancer cells. *Peptides.* 32, 342-352.
- 440 Chen, Y. Y., Wu, X. Q., Tang, W. J., Shi, J. B., Li, J., and Liu, X. H. (2016). Novel  
441 dihydropyrazole-chromen: design and modulates hTERT inhibition proliferation of MGC-803.  
442 *Eur J Med Chem.* 110, 65-75.
- 443 Chiodi, I., and Mondello, C. (2012). Telomere-independent functions of telomerase in nuclei,  
444 cytoplasm, and mitochondria. *Front Oncol.* 2, 133-139.



- 445 Choi, W. H., and Jiang, M. H. (2014). Evaluation of antibacterial activity of hexanedioic acid  
446 isolated from *Hermetia illucens* larvae. *J Appl. Biomed.* 12, 179-189.
- 447 Elhag, O., Zhou, D., Song, Q., Soomro, A. A., Cai, M., Zheng, L., Yu, Z., and Zhang, J.  
448 (2017). Screening, expression, purification and functional characterization of Novel  
449 Antimicrobial Peptide Genes from *Hermetia illucens* (L.). *PloS One.* 12, e0169582.
- 450 El-Mazny, A., Sayed, M., and Sharaf, S. (2014). Human telomerase reverse transcriptase  
451 messenger RNA (TERT mRNA) as a tumor marker for early detection of hepatocellular  
452 carcinoma. *Arab J Gastroenterol.* 15, 68-71.
- 453 Fu, X. S., Shen, C. X., Li, G. X., Zhang, X. Y., and Wen, Z. (2015). Quantitative detection of  
454 plasma level of human telomerase reverse transcriptase mRNA in patients with  
455 nasopharyngeal carcinoma. *J South Med Univ.* 35, 894-897.
- 456 Hu, T. H., and Xu, X. X. (2017). Effects of telomerase inhibitors on proliferation and  
457 apoptosis of human colon cancer HCT116 cells in different aneuploidy states. *Chin J Cell*  
458 *Biol.* 39, 426-434.
- 459 Huang, H. N., Rajanbabu, V., Pan, C. Y., Chan, Y. L., Chen, J. Y., and Wu, C. J. (2015).  
460 Enhanced control of bladder-associated tumors using shrimp anti-lipopolysaccharide factor  
461 (SALF) antimicrobial peptide as a cancer vaccine adjuvant in Mice. *Mar Drugs.* 13,  
462 3241-3258.
- 463 Huang, Y., Huang, J., and Chen, Y. (2010). Alpha - helical cationic antimicrobial peptides:  
464 relationships of structure and function. *Protein Cell.* 1, 143-152.
- 465 Iwasaki, T., Ishibashi, J., Tanaka, H., Sato, M., Asaoka, A., Taylor, D., and Yamakawa, M.  
466 (2009). Selective cancer cell cytotoxicity of enantiomeric 9-mer peptides derived from beetle  
467 defensins depends on negatively charged phosphatidylserine on the cell surface. *Peptides.* 30,  
468 660-668.

- 469 Jiang, H. G., Gao, M., Shen, Z., Luo, B., Li, R., Jiang, X., Ding, R., Ha, Y., Wang, Z., and Jie,  
470 W. (2014). Blocking PI3K/Akt signaling attenuates metastasis of nasopharyngeal carcinoma  
471 cells through induction of mesenchymal-epithelial reverting transition. *Oncol Rep*, 2014, 32:  
472 559-566.
- 473 Kang, Y., Zhang, J., Sun, P., Shang, J. (2013). Circulating cell-free human telomerase reverse  
474 transcriptase mRNA in plasma and its potential diagnostic and prognostic value for gastric  
475 cancer. *Int J Clin Oncol*. 18, 478-486.
- 476 Lee, H., Hwang, J. S., Lee, J., Kim, J. I., and Lee, D. G. (2015a). Scolopendin 2, a cationic  
477 antimicrobial peptide from centipede, and its membrane-active mechanism. *Biochim Biophys*  
478 *Acta*. 1848, 634-642.
- 479 Lee, J. H., Kim, I., Kim, S., Yun, E., Nam, S., Ahn, M., Kang, D., and Hwang, J. S. (2015b).  
480 Anticancer activity of CopA3 dimer peptide in human gastric cancer cells. *BMB Rep*. 48,  
481 324-329
- 482 Lemeshko, V. V. (2013). Electrical potentiation of the membrane permeabilization by new  
483 peptides with anticancer properties. *Biochim Biophys Acta*. 1828, 1047-1056.
- 484 Li, P., Tong, Y., Yang, H., Zhou, S., Xiong, F., Huo, T., and Mao, M. (2014). Mitochondrial  
485 translocation of human telomerase reverse transcriptase in cord blood mononuclear cells of  
486 newborns with gestational diabetes mellitus mothers. *Diabetes Res Clin Pract*. 103, 310-318.
- 487 MahdaviFar, N., Ghoncheh, M., Mohammadian-Hafshejani, A., Khosravi, B., and Salehiniya,  
488 H. (2016). Epidemiology and inequality in the incidence and mortality of nasopharynx cancer  
489 in Asia. *Osong Public Health Res Perspect*. 7, 360-372.
- 490 Ng, J., and Lee, P. (2017). The Role of Radiotherapy in Localized Esophageal and Gastric  
491 Cancer. *Hematol Oncol Clin North Am*. 1, 245-257.

- 492 Nguyen, L. T., Haney, E. F., and Vogel, H. J. (2011). The expanding scope of antimicrobial  
493 peptide structures and their modes of action. *Trends Biotechnol.* 29, 464-472.
- 494 Park, S., Chang, B. S., and Yoe, S. M. (2014). Detection of antimicrobial substances from  
495 larvae of the black soldier fly, *Hermetia illucens* (Diptera: Stratiomyidae). *Entomol Res.* 44,  
496 58-64.
- 497 Park, S. I., Kim, J. W., and Yoe, S. M. (2015). Purification and characterization of a novel  
498 antibacterial peptide from black soldier fly (*Hermetia illucens*) larvae. *Dev Comp Immunol.*  
499 52, 98-106.
- 500 Ravi, C., Jeyashree, A., and Renuka Devi, K. (2011). Antimicrobial peptides from insect: An  
501 overview. *Res in Biotech.* 2, 1-7.
- 502 Riedl, S., Zweytick, D., and Lohner, K. (2011). Membrane-active host defense  
503 peptides-challenges and perspectives for the development of novel anticancer drugs. *Chem*  
504 *Phys Lipids.* 164, 766-781.
- 505 Shi, X., Liu, Y. H., Shen, C. X., Wen, Z., Li, G. X., and Fu, X. S. (2015). Up-regulated  
506 telomerase and inhibited proliferation induced by hypoxia in nasopharyngeal carcinoma cells.  
507 *Chin J Cancer Prev Trea.* 22, 507-513.
- 508 Slaninová, J., Mlsová, V., Kroupová, H., Alán, L., Tůmová, T., Borovičková, L., Fučík, V.,  
509 and Ceřovský, V. (2012). Toxicity study of antimicrobial peptides from wild bee venom and  
510 their analogs toward mammalian normal and cancer cells. *Peptides.* 33, 18-26.
- 511 Su, M., Chang, W., Cui, M., Lin, Y., Wu, S., and Xu, T. (2015). Expression and anticancer  
512 activity analysis of recombinant human uPA1 $\square$ 43-melittin. *Int J Oncol.* 46, 619-626.
- 513 Thangavel, S., Yoshitomi, T., Sakharkar, M. K., and Nagasaki, Y. (2016). Redox nanoparticle  
514 increases the chemotherapeutic efficiency of pioglitazone and suppresses its toxic side effects.  
515 *Biomaterials.* 99, 109-123.

- 516 Vogel, H., Müller, A., Heckel, D. G., and Vilcinskis, A. (2018). Nutritional immunology:  
517 Diversification and diet-dependent expression of antimicrobial peptides in the black soldier  
518 fly *Hermetia illucens*. *Dev Comp Immunol.* 78, 141-148.
- 519 Wang, C., Chen, Y. W., Zhang, L., Gong, X. G., Zhou, Y., and Shang, D. J. (2016).  
520 Melanoma cell surface-expressed phosphatidylserine as a therapeutic target for cationic  
521 anticancer peptide, temporin-1CEa. *J Drug Target.* 24, 548-556.
- 522 Wang, C., Li, H. B., Li, S., Tian, L. L., and Shang, D. J. (2012). Antitumor effects and cell  
523 selectivity of temporin-1CEa, an antimicrobial peptide from the skin secretions of the Chinese  
524 brown frog (*Rana chensinensis*). *Biochimie.* 94, 434-441.
- 525 Wanmakok, M., Orrapin, S., Intorasoot, A., and Intorasoot, S. (2018). Expression in  
526 *Escherichia coli* of novel recombinant hybrid antimicrobial peptide AL32-P113 with  
527 enhanced antimicrobial activity *in vitro*. *Gene.* (in press).
- 528 Xia, Q. , Zhao , Q. F., Liao, Y., Zhu, W., Yu, G. H., Chen, F. Y., and Song, M. Y. (2013).  
529 Optimization of conditions for the induction of antibacterial peptides and their crude extracts  
530 activity in *Hermetia illucens*. *Chin J Environ Entomol.* 35, 44-48.
- 531 Yan, R., Liu, Y., Zhu, X. T., Yi, X. F., Liu, L., and Li, X. F. (2015). Effect of magnesium  
532 cantharidate on hepatocellular carcinoma SMMC-7721 cells and subcutaneous hepatocellular  
533 SMMC-7721 carcinoma transplantation tumors in nude mice. *Chin J Appl Entomol.* 52,  
534 477-485.
- 535 Yang, J., Xu, X., Hao, Y., Chen, J., Lu, H., Qin, J., Peng, L., and Chen, B. (2013). Expression  
536 of DNA-PKcs and BRCA1 as prognostic indicators nasopharyngeal carcinoma following  
537 intensity-modulated radiation therapy. *Oncol Lett.* 5, 1199-1204.

538 Zhang, L. (2015). Study on the Effect of Amphibian Antibacterial Peptide Temporin-1CEa  
539 and Its Modified Peptides on Neovascularization and Metastasis of Melanoma. M. S. thesis,  
540 Liaoning Normal University, Dalian.

541 **Figure captions**

542 **Figure 1** Separation crude extract from the hemolymph of *H. illucens* larvae by RP-HPLC

543 1) Separation of crude extract; 2) Purity detection of HI-3 by RP-HPLC

544

545 **Figure 2** MIC of HI-3 against four strains of bacteria

546

547 **Figure 3** Effects of HI-3 on proliferation inhibition rates of CNE2 Cells and HUV-C after 48

548 h treatment

549 Note: # means significant difference between the CNE2 cells group and HUV-C group under

550 the same concentration at the levels of 0.05.  $\Delta$  means this significant difference at the levels

551 of 0.01.

552

553 **Figure 4** Effects of HI-3 on morphology of CNE2 cells and HUV-C (400  $\times$ )

554 Note: 1) CNE2 cells A: Negative control; B: 40  $\mu$ g/ml; C: 80 $\mu$ g/ml; D: 160  $\mu$ g/ml

555 2) HUV-C A: Negative control; B: 40  $\mu$ g/ml; C: 80 $\mu$ g/ml; D: 160  $\mu$ g/ml

556

557 **Figure 5** Apoptosis rates of CNE2 cells and HUV-C after treated with HI-3

558 Note: 1) CNE2 cells A: Negative control; B: 40  $\mu$ g/ml; C: 80 $\mu$ g/ml; D: 160  $\mu$ g/ml

559 2) HUV-C A: Negative control; B: 40  $\mu$ g/ml; C: 80 $\mu$ g/ml; D: 160  $\mu$ g/ml

560 3) Apoptosis rate of HUV-C and CNE2 cells after treated with HI-3 for 48 h. #  $P < 0.05$

561 means the apoptosis of CNE2 cells were significantly higher when compared with

562 the CNE2 cells in the negative group.  $\Delta P < 0.05$  means there was significant  
563 difference between CNE2 cells and HUV-C group.

564

565 **Figure 6** Effects of 160  $\mu\text{g/ml}$  of HI-3 on the migration of CNE2 cells (100 $\times$ )

566 1) Morphology observation, N: Negative control group; P: 160  $\mu\text{g/ml}$  of HI-3 group

567 2) Migration rates of CNE2 cells

568

569 **Figure 7** Expression of telomerase hTERT and GAPDH in CNE2 cells after treated with HI-3

570 1) RT-PCR analysis on hTERT gene expression, Note: 1: Negative control group; 2: 160

571  $\mu\text{g/ml}$  HI-3 group; 3: Standard nucleic acid molecule; 4, 5: Internal gene GAPDH;

572 2) Western blotting on hTERT protein expression;

573 3) Statistics of expression of hTERT protein.

574 **Table legends**

575 **Table 1** Inhibition zone diameters against the four strains of bacteria after treated with HI-1,  
576 HI-2 and HI-3 (n=4,  $\bar{x} \pm s$ , mm )

577 Note: <sup>#</sup>  $P < 0.05$  indicated there were significant differences in inhibition zone diameters  
578 between HI-3 group and negative control. And <sup>Δ</sup>  $P < 0.05$  indicated the inhibition zone  
579 diameters in the *Bacillus subtilis* treatment were significantly lower when compared with the  
580 *Staphylococcus aureus* and *Escherichia coli* treatments in the HI-3 group.

581

582 **Table 2** Effects of HI-1, HI-2 and HI-3 on proliferation inhibition rates of CNE2 cell (n=4,  
583  $\bar{x} \pm s$ , Inhibition rate : %)

584 Note: <sup>#</sup>  $P < 0.05$  indicated that there were significant differences in the inhibition rates  
585 between HI-3 group and HI-1/HI-2 group under the same concentration. <sup>Δ</sup>  $P < 0.05$  indicated  
586 that there were significant differences in inhibition rates between different time at the same  
587 concentration of HI-3 group.

588

589 **Table 3** Effect of HI-3 on the expression of telomerase hTERT gene ( n=6,  $\bar{x} \pm s$  )

590 Note: <sup>#</sup>  $P < 0.05$  indicated that there were significant differences in expression levels between  
591 HI-3 group and negative control group.



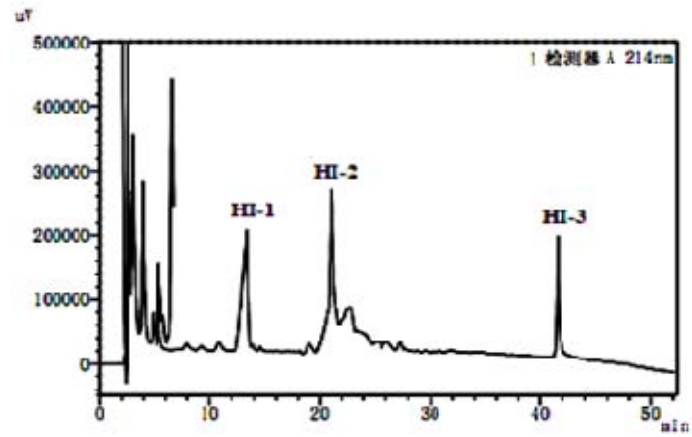

1)

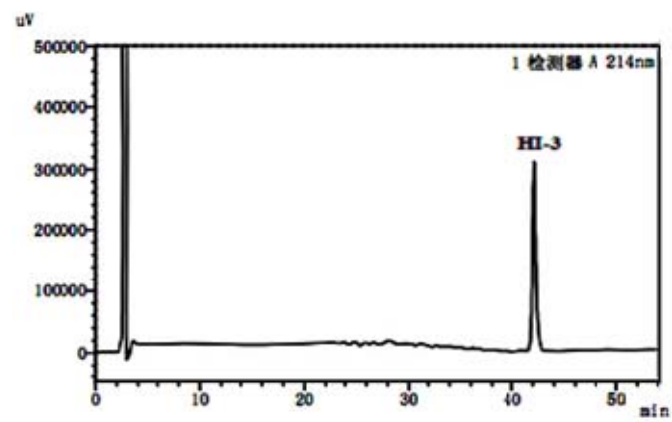

2)

Figure 1

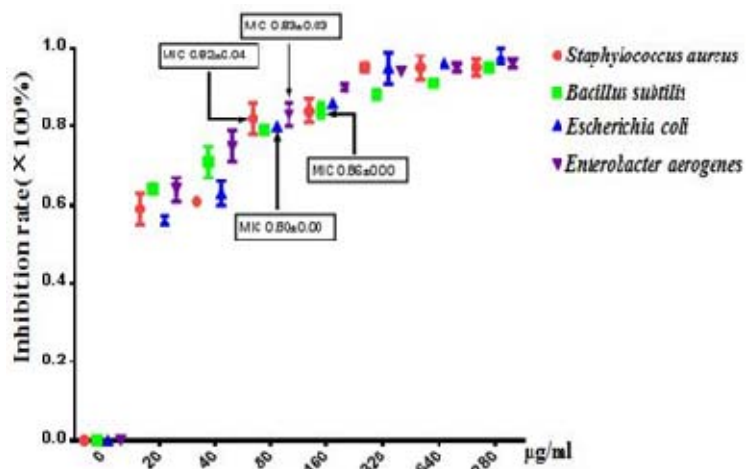

Figure 2

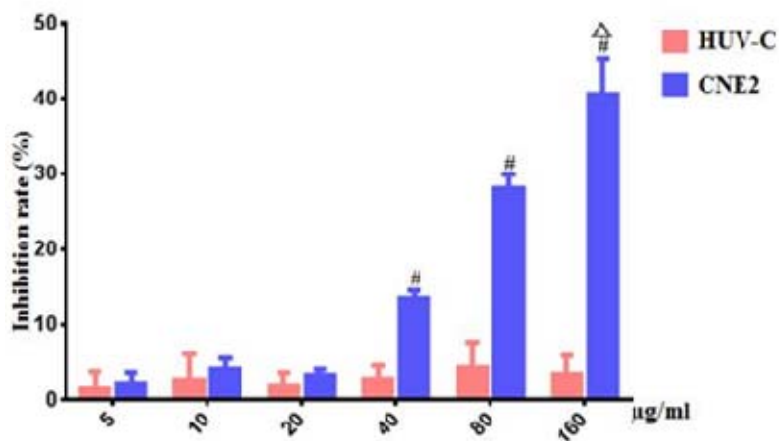

Figure 3

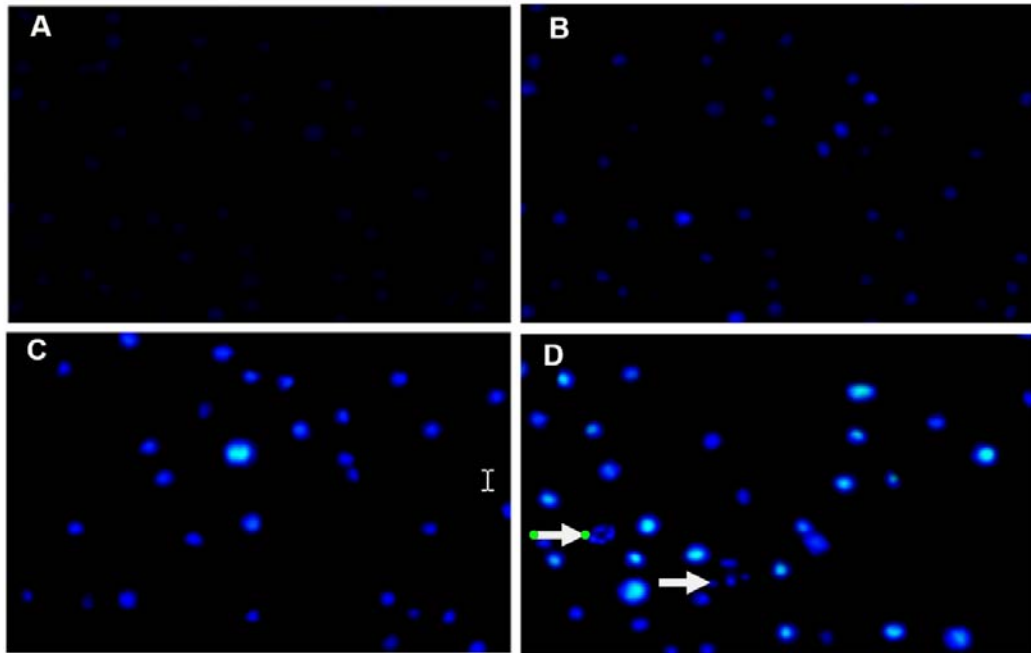

1)

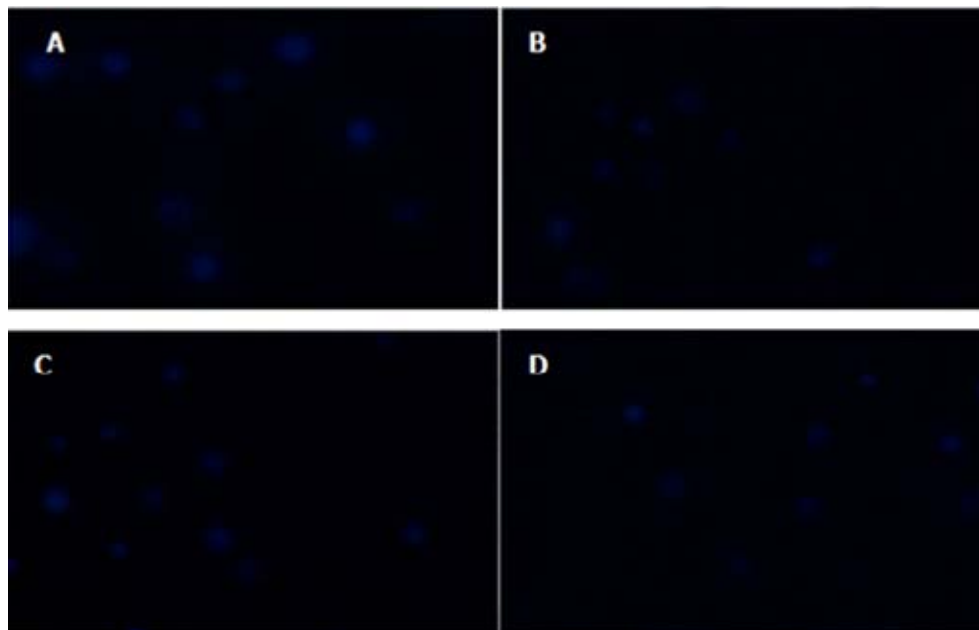

2)

**Figure 4**

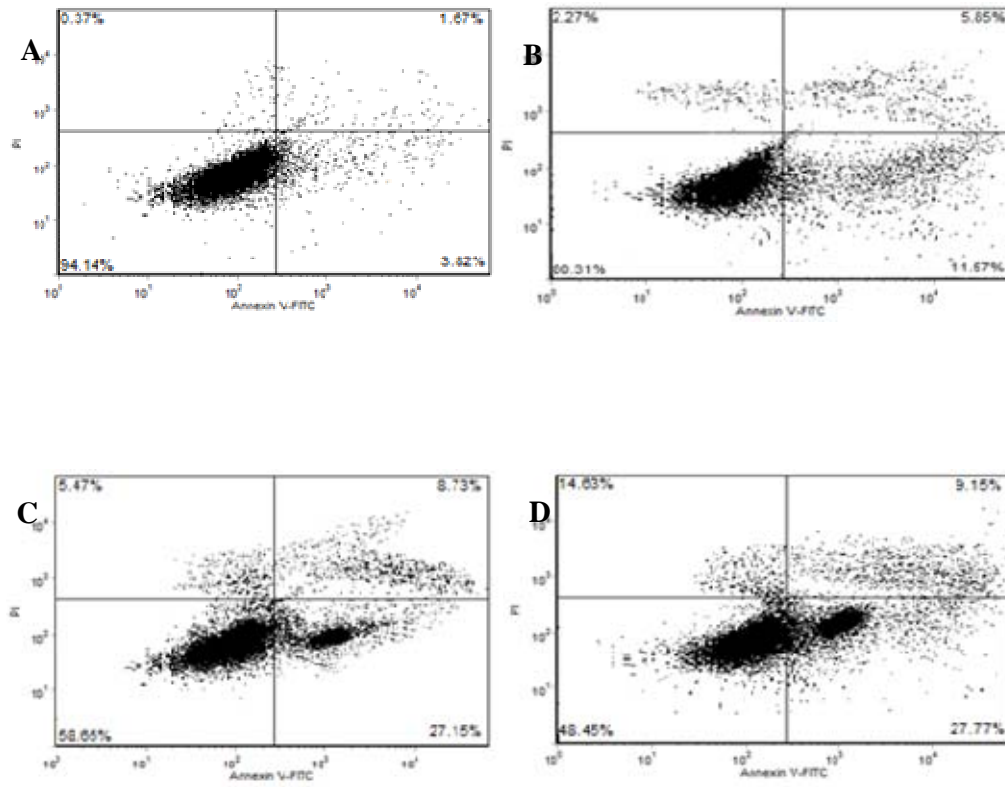

1)

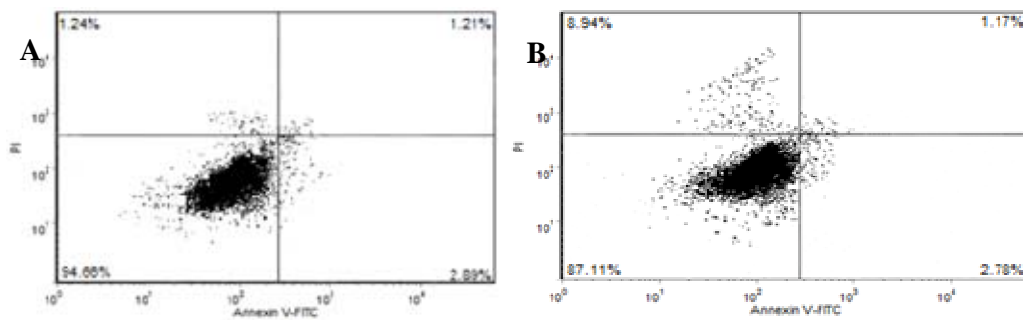

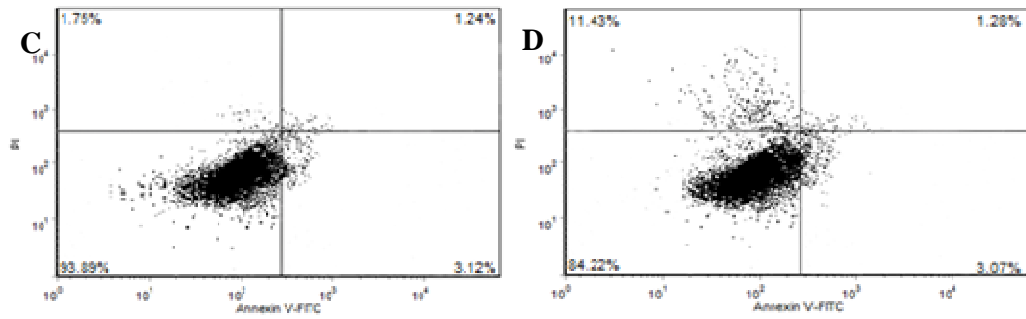

2)

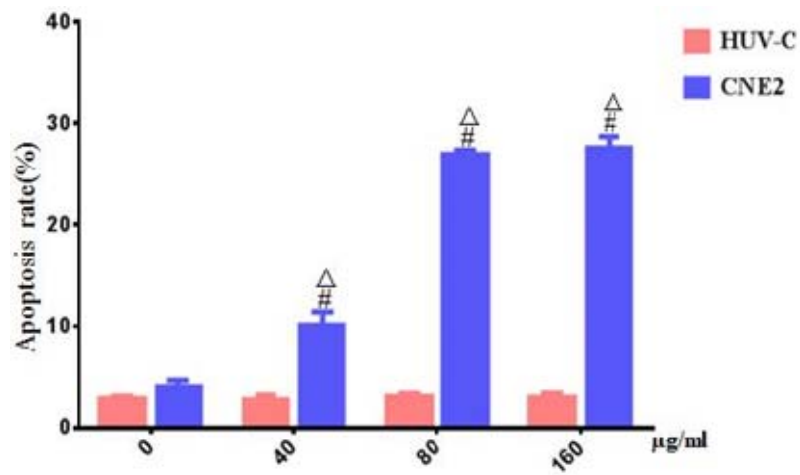

3)

Figure 5

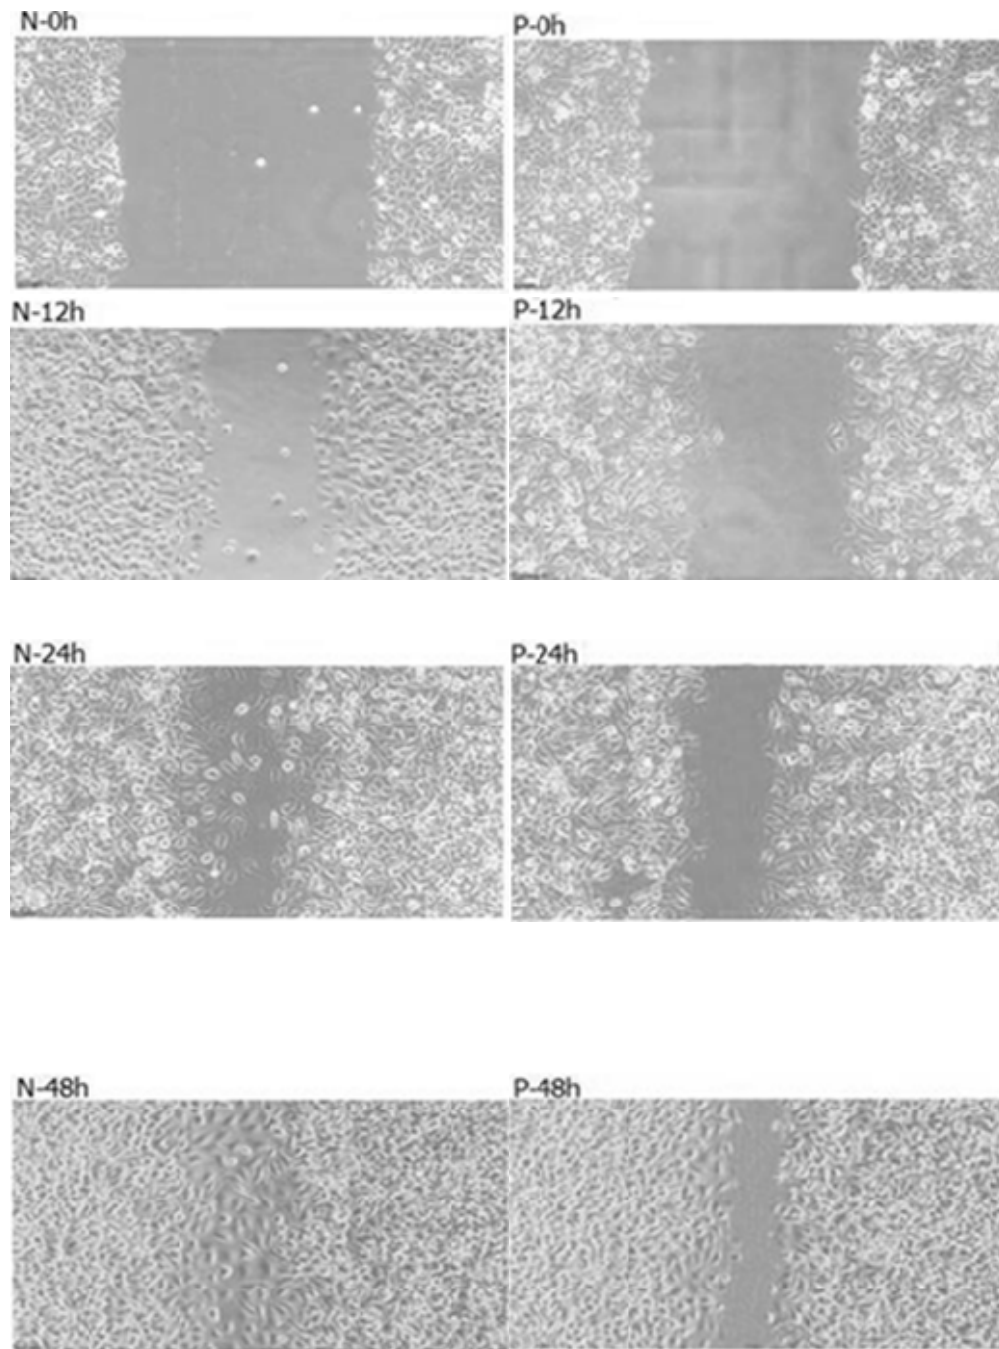

1)

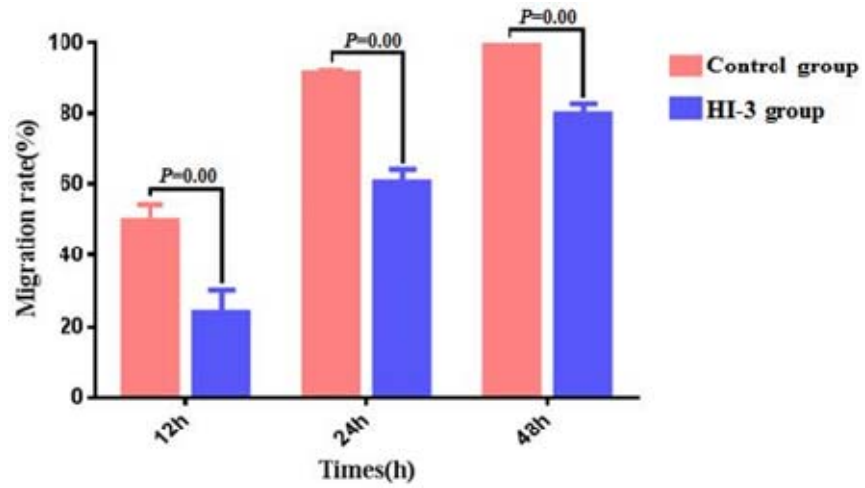

2)

Figure 6

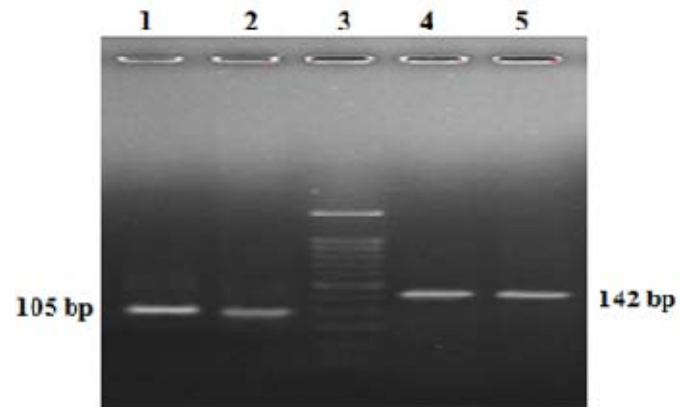

1)

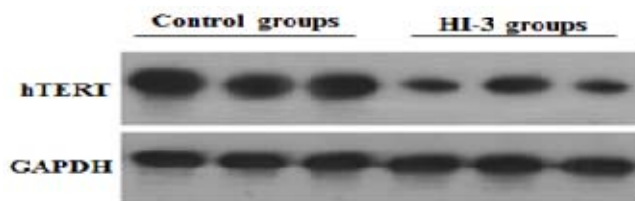

2)

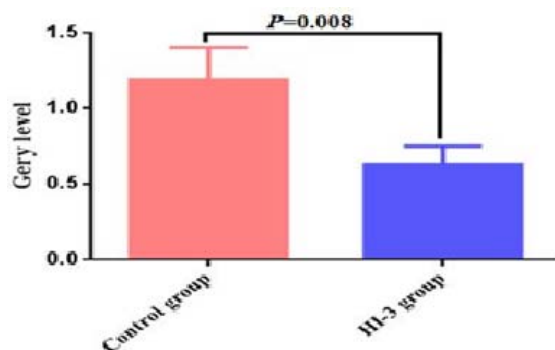

3)

Figure 7

Table 1

| Groups              | The bacterial strain         |                          |                         |                               |
|---------------------|------------------------------|--------------------------|-------------------------|-------------------------------|
|                     | <i>Staphylococcus aureus</i> | <i>Bacillus subtilis</i> | <i>Escherichia coli</i> | <i>Enterobacter aerogenes</i> |
| Negative control    | 0.00±0.00                    | 0.00±0.00                | 0.00±0.00               | 0.00±0.00                     |
| Gentamicin sulphate | 18.99±0.50                   | 15.71±0.68               | 17.64±0.51              | 16.27±0.75                    |
| HI-1                | 0.00±0.00                    | 0.00±0.00                | 0.00±0.00               | 0.00±0.00                     |
| HI-2                | 0.00±0.00                    | 0.00±0.00                | 0.00±0.00               | 0.00±0.00                     |
| HI-3                | 11.79±1.17 <sup>#</sup>      | 10.84±1.00 <sup>#Δ</sup> | 11.83±0.82 <sup>#</sup> | 11.41±0.78 <sup>#</sup>       |



**Table 2**

| Groups | Concentration<br>s<br>( $\mu\text{g/ml}$ ) | Times           |                 |                 |
|--------|--------------------------------------------|-----------------|-----------------|-----------------|
|        |                                            | 12h             | 24h             | 48h             |
| HI-1   | 5                                          | 2.98 $\pm$ 0.20 | 1.43 $\pm$ 0.43 | 1.96 $\pm$ 0.35 |
|        | 10                                         | 2.70 $\pm$ 0.19 | 3.07 $\pm$ 0.29 | 2.64 $\pm$ 0.80 |
|        | 20                                         | 2.44 $\pm$ 0.13 | 2.60 $\pm$ 0.37 | 2.57 $\pm$ 0.13 |
|        | 40                                         | 3.16 $\pm$ 0.47 | 3.53 $\pm$ 0.31 | 2.43 $\pm$ 0.13 |
|        | 80                                         | 3.37 $\pm$ 0.33 | 3.90 $\pm$ 0.34 | 4.38 $\pm$ 0.33 |
|        | 160                                        | 3.49 $\pm$ 0.57 | 4.17 $\pm$ 0.57 | 3.16 $\pm$ 0.29 |
| HI-2   | 5                                          | 1.78 $\pm$ 0.24 | 1.08 $\pm$ 0.7  | 2.15 $\pm$ 0.61 |

|      |     |                         |                         |                          |
|------|-----|-------------------------|-------------------------|--------------------------|
|      | 10  | 2.18±0.37               | 2.85±1.41               | 2.75±0.98                |
|      | 20  | 2.93±0.78               | 2.48±0.29               | 2.29±0.06                |
|      | 40  | 1.67±0.74               | 3.69±0.76               | 2.36±0.13                |
|      | 80  | 3.25±0.14               | 3.87±0.56               | 4.16±0.14                |
|      | 160 | 3.63±0.83               | 3.18±0.61               | 3.33±0.18                |
|      | 5   | 2.18±0.94               | 1.83±0.76               | 2.28±1.42                |
|      | 10  | 2.27±0.94               | 2.75±0.46               | 4.14±1.40                |
| HI-3 | 20  | 1.74±0.04               | 4.07±1.58               | 3.33±0.77                |
|      | 40  | 5.68±0.63 <sup>#</sup>  | 9.82±1.52 <sup>#</sup>  | 13.49±1.06 <sup>#</sup>  |
|      | 80  | 10.94±1.43 <sup>#</sup> | 16.21±0.77 <sup>#</sup> | 28.09±1.84 <sup>#</sup>  |
|      | 160 | 17.80±1.02 <sup>#</sup> | 21.78±1.61 <sup>#</sup> | 40.56±6.80 <sup>#Δ</sup> |

**Table 3**

| Groups           | hTERT Ct   | GAPDH Ct   | ΔCt                    | ΔΔCt      | 2 <sup>-ΔΔCt</sup>     |
|------------------|------------|------------|------------------------|-----------|------------------------|
| HI-3             | 28.43±0.53 | 21.84±0.34 | 6.58±0.54 <sup>#</sup> | 1.51±0.54 | 0.37±0.15 <sup>#</sup> |
| Negative control | 25.56±0.26 | 20.48±0.20 | 5.07±0.41              | 0.00±0.41 | 1.03±0.31              |
